# Supplementary material for: Deciphering the Mechanism of β-Aminobutyric Acid-Induced Resistance in Wheat to the Grain Aphid, Sitobion avenae
Source: PubMed Central journal article supplement (PMC3961263; doi:10.1371/journal.pone.0091768), 2014-03-20
Supplement: pone.0091768.s004.pdf [file pone.0091768.s004.pdf]

**Table S1** Composition of standard artificial diet for *Sitobion avenae*.

| <i>L-Amino acids and amides (mg)</i> |      | <i>Others</i>                        |          |
|--------------------------------------|------|--------------------------------------|----------|
| Alanine                              | 30   | NaCl                                 | 1.271 mg |
| Arginine                             | 400  | CuCl <sub>2</sub> •2H <sub>2</sub> O | 0.3 mg   |
| Asparagine                           | 200  | FeCl <sub>3</sub> •6H <sub>2</sub> O | 2.2 mg   |
| Aspartic acid                        | 69   | MnCl <sub>2</sub> •4H <sub>2</sub> O | 0.79 mg  |
| Cysteine                             | 50   | ZnCl <sub>2</sub>                    | 0.471 mg |
| Cystine                              | 1    | MgCl <sub>2</sub> •6H <sub>2</sub> O | 150 mg   |
| Glutamic acid                        | 200  | KH <sub>2</sub> PO <sub>4</sub>      | 200 mg   |
| Glutamine                            | 600  | Cholesterol                          | 5 mg     |
| Glycine                              | 20   | Sucrose                              | 15.4 g   |
| Histidine                            | 200  | Water to make                        | 100 mL   |
| DL-Homoserine                        | 50   |                                      |          |
| Isoleucine                           | 100  |                                      |          |
| Leucine                              | 42.5 |                                      |          |
| Lysine mono-HCl                      | 200  |                                      |          |
| Methionine                           | 100  |                                      |          |
| Phenylalanine                        | 100  |                                      |          |
| Proline                              | 100  |                                      |          |
| Serine                               | 100  |                                      |          |
| Threonine                            | 200  |                                      |          |
| Tryptophan                           | 150  |                                      |          |
| Tyrosine                             | 20   |                                      |          |
| Valine                               | 37.2 |                                      |          |
| <i>Vitamins (mg)</i>                 |      |                                      |          |
| Ascorbic acid                        | 100  |                                      |          |
| Biotin                               | 0.1  |                                      |          |
| Calcium pantothenate                 | 5    |                                      |          |
| Choline chloride                     | 50   |                                      |          |
| Folic acid                           | 1    |                                      |          |
| Inositol                             | 50   |                                      |          |
| Nicotinic acid                       | 10   |                                      |          |
| p-Aminobenzoic acid                  | 10   |                                      |          |
| Pyridoxine HCl                       | 2.5  |                                      |          |
| Riboflavin                           | 0.5  |                                      |          |
| Thiamine HCl                         | 2.5  |                                      |          |
