# Supplementary material for: Deciphering the Mechanism of β-Aminobutyric Acid-Induced Resistance in Wheat to the Grain Aphid, Sitobion avenae
Source: PubMed Central journal article supplement (PMC3961263; doi:10.1371/journal.pone.0091768), 2014-03-20
Supplement: pone.0091768.s005.pdf [file pone.0091768.s005.pdf]

**Table S2** Masses of precursor and product ions and collision energy for liquid chromatography-electrospray ionization tandem mass spectrometry (LC-ESI-MS-MS) analysis of amino acids.

| Amino acid        | Precursor ion [M+H] <sup>+</sup><br>( <i>m/z</i> ) | Product ion<br>( <i>m/z</i> ) | Collision energy<br>(eV) |
|-------------------|----------------------------------------------------|-------------------------------|--------------------------|
| Ala               | 90                                                 | 70                            | 0                        |
| Ser               | 106                                                | 60                            | 35                       |
| Pro               | 116                                                | 70                            | 35                       |
| Val               | 118                                                | 72                            | 35                       |
| Thr               | 120                                                | 74                            | 35                       |
| Cyss              | 241                                                | 152                           | 35                       |
| Ile/Leu           | 132                                                | 86                            | 35                       |
| Asp               | 134                                                | 74                            | 35                       |
| Lys               | 147                                                | 130                           | 35                       |
| Glu               | 148                                                | 130                           | 35                       |
| Met               | 150                                                | 133                           | 35                       |
| His               | 156                                                | 110                           | 35                       |
| Phe               | 166                                                | 120                           | 35                       |
| Arg               | 175                                                | 116                           | 35                       |
| Tyr               | 182                                                | 136                           | 35                       |
| Aminobutyric acid | 104                                                | 86                            | 35                       |
